# Supplementary material for: Polar lipid-enriched milk fat globule membrane supplementation in maternal high-fat diet promotes intestinal barrier function and modulates gut microbiota in male offspring
Source: Royal Society of Chemistry journal article supplement (doi:10.1039/d2fo04026c), 2023-01-01

**Supplemental Table 1. The contents of phospholipids in MFGM-PL.** The contents of phospholipids in MFGM-PL were determined using ultra-performance liquid chromatography and tandem mass spectrometry. Values were expressed as mean  $\pm$  SEM, n=6. PC: Phosphatidylcholine; PE: Phosphatidylethanolamine; PA: Phosphatidic acid; PI: Phosphatidylinositol; PG: Phosphatidylglycerol; SM: Sphingomyelin; LPC: Lyso-Phosphatidylcholine; LPE: Lyso-Phosphatidylethanolamine.

**Supplemental Table 2. Maternal body weight and serum biomarkers.** Values were expressed as mean  $\pm$  SEM, n=6. The statistical analysis was performed using one-way ANOVA and Tukey's multiple-comparison test by SPSS software (version 20.0, IBM Inc., Chicago, IL, USA). Different letters indicate significant differences ( $P < 0.05$ ). TC, total cholesterol; TG total triglyceride; LDL-C, low-density lipoprotein cholesterol; HDL-C, high-density lipoprotein cholesterol; LPS, lipopolysaccharide; TNF- $\alpha$ , tumor necrosis factor-alpha; IL-1 $\beta$ , interleukin-1 $\beta$ ; IL-6, interleukin-6.

**Supplementary Figure 1. Maternal body weight after 8 weeks of high-fat diet before mating.** Values were expressed as mean  $\pm$  SEM, n=6. The statistical analysis was performed using one-way ANOVA and Tukey's multiple-comparison test by SPSS software (version 20.0, IBM Inc., Chicago, IL, USA). Different letters indicate significant differences ( $P < 0.05$ ).

**Supplemental Table 1**

| Phospholipid | Content (nmol/mg MFGM-PL) |
|--------------|---------------------------|
| PC           | 22.79±0.40                |
| PE           | 17.40±0.27                |
| PA           | 20.46±4.04                |
| PI           | 1.76±0.05                 |
| PG           | 0.28±0.01                 |
| SM           | 5.71±0.15                 |
| LPC          | 0.37±0.01                 |
| LPE          | 0.57±0.01                 |

The contents of phospholipids in MFGM-PL were determined using ultra-performance liquid chromatography and tandem mass spectrometry. Values were expressed as mean  $\pm$  SEM, n=6. PC: Phosphatidylcholine; PE: Phosphatidylethanolamine; PA: Phosphatidic acid; PI: Phosphatidylinositol; PG: Phosphatidylglycerol; SM: Sphingomyelin; LPC: Lyso-Phosphatidylcholine; LPE: Lyso-Phosphatidylethanolamine.

**Supplemental Table 2**

|                       | <b>CON</b>                  | <b>CON+MFGM-PL</b>          | <b>HFD</b>                  | <b>HFD+MFGM-PL</b>         |
|-----------------------|-----------------------------|-----------------------------|-----------------------------|----------------------------|
| Body weight (g)       | 341.84 ± 10.24 <sup>b</sup> | 345.17 ± 10.64 <sup>b</sup> | 386.12 ± 14.44 <sup>a</sup> | 346.76 ± 8.77 <sup>b</sup> |
| Serum insulin (ng/mL) | 1.06 ± 0.05 <sup>c</sup>    | 1.00 ± 0.06 <sup>c</sup>    | 1.68 ± 0.03 <sup>a</sup>    | 1.39 ± 0.02 <sup>b</sup>   |
| Serum TC (mg/dL)      | 1.65 ± 0.05 <sup>c</sup>    | 1.72 ± 0.12 <sup>c</sup>    | 3.65 ± 0.12 <sup>a</sup>    | 2.05 ± 0.09 <sup>b</sup>   |
| Serum TG (mg/dL)      | 0.59 ± 0.06 <sup>b</sup>    | 0.54 ± 0.05 <sup>b</sup>    | 1.91 ± 0.36 <sup>a</sup>    | 0.62 ± 0.04 <sup>b</sup>   |
| Serum LDL-C (mg/dL)   | 0.21 ± 0.01 <sup>b</sup>    | 0.24 ± 0.02 <sup>b</sup>    | 0.50 ± 0.12 <sup>a</sup>    | 0.28 ± 0.03 <sup>b</sup>   |
| Serum HDL-C (mg/dL)   | 1.28 ± 0.06 <sup>a</sup>    | 1.22 ± 0.06 <sup>a</sup>    | 0.82 ± 0.09 <sup>b</sup>    | 1.25 ± 0.12 <sup>a</sup>   |
| Serum LPS (EU/L)      | 334.24 ± 14.87 <sup>b</sup> | 349.39 ± 16.20 <sup>b</sup> | 541.31 ± 16.63 <sup>a</sup> | 353.43 ± 7.64 <sup>b</sup> |
| Serum TNF-α (pg/mL)   | 74.43 ± 1.49 <sup>b</sup>   | 73.08 ± 5.91 <sup>b</sup>   | 90.91 ± 2.32 <sup>a</sup>   | 75.04 ± 3.54 <sup>b</sup>  |
| Serum IL-1β (pg/mL)   | 23.55 ± 1.61 <sup>b</sup>   | 23.10 ± 1.09 <sup>b</sup>   | 41.19 ± 1.62 <sup>a</sup>   | 24.14 ± 0.77 <sup>b</sup>  |
| Serum IL-6 (pg/mL)    | 83.36 ± 1.53 <sup>b</sup>   | 84.68 ± 3.26 <sup>b</sup>   | 106.98 ± 2.24 <sup>a</sup>  | 86.23 ± 3.76 <sup>b</sup>  |

Supplementary Figure 1

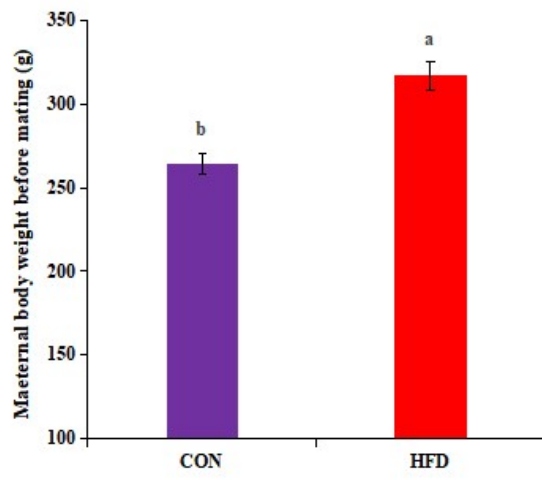

Supplement: d2fo04026c1.pdf [file d2fo04026c1.pdf]
