# Supplementary material for: Polar lipid-enriched milk fat globule membrane supplementation in maternal high-fat diet promotes intestinal barrier function and modulates gut microbiota in male offspring
Source: Royal Society of Chemistry journal article supplement (doi:10.1039/d2fo04026c), 2023-01-01
Supplement: d2fo04026c2.pdf [file d2fo04026c2.pdf]

**Supplemental Table 1. Maternal body weight and serum biomarkers.** Values were expressed as mean  $\pm$  SEM, n=6. Different letters indicate significant differences ( $P < 0.05$ ). TC, total cholesterol; TG total triglyceride; LDL-C, low-density lipoprotein cholesterol; HDL-C, high-density lipoprotein cholesterol; LPS, lipopolysaccharide; TNF- $\alpha$ , tumor necrosis factor-alpha; IL-1 $\beta$ , interleukin-1 $\beta$ ; IL-6, interleukin-6.

|                             | CON                             | CON+MFGM-PL                     | HFD                             | HFD+MFGM-PL                    |
|-----------------------------|---------------------------------|---------------------------------|---------------------------------|--------------------------------|
| Body weight (g)             | 341.84 $\pm$ 10.24 <sup>b</sup> | 345.17 $\pm$ 10.64 <sup>b</sup> | 386.12 $\pm$ 14.44 <sup>a</sup> | 346.76 $\pm$ 8.77 <sup>b</sup> |
| Serum insulin (ng/mL)       | 1.06 $\pm$ 0.05 <sup>c</sup>    | 1.00 $\pm$ 0.06 <sup>c</sup>    | 1.68 $\pm$ 0.03 <sup>a</sup>    | 1.39 $\pm$ 0.02 <sup>b</sup>   |
| Serum TC (mg/dL)            | 1.65 $\pm$ 0.05 <sup>c</sup>    | 1.72 $\pm$ 0.12 <sup>c</sup>    | 3.65 $\pm$ 0.12 <sup>a</sup>    | 2.05 $\pm$ 0.09 <sup>b</sup>   |
| Serum TG (mg/dL)            | 0.59 $\pm$ 0.06 <sup>b</sup>    | 0.54 $\pm$ 0.05 <sup>b</sup>    | 1.91 $\pm$ 0.36 <sup>a</sup>    | 0.62 $\pm$ 0.04 <sup>b</sup>   |
| Serum LDL-C (mg/dL)         | 0.21 $\pm$ 0.01 <sup>b</sup>    | 0.24 $\pm$ 0.02 <sup>b</sup>    | 0.50 $\pm$ 0.12 <sup>a</sup>    | 0.28 $\pm$ 0.03 <sup>b</sup>   |
| Serum HDL-C (mg/dL)         | 1.28 $\pm$ 0.06 <sup>a</sup>    | 1.22 $\pm$ 0.06 <sup>a</sup>    | 0.82 $\pm$ 0.09 <sup>b</sup>    | 1.25 $\pm$ 0.12 <sup>a</sup>   |
| Serum LPS (EU/L)            | 334.24 $\pm$ 14.87 <sup>b</sup> | 349.39 $\pm$ 16.20 <sup>b</sup> | 541.31 $\pm$ 16.63 <sup>a</sup> | 353.43 $\pm$ 7.64 <sup>b</sup> |
| Serum TNF- $\alpha$ (pg/mL) | 74.43 $\pm$ 1.49 <sup>b</sup>   | 73.08 $\pm$ 5.91 <sup>b</sup>   | 90.91 $\pm$ 2.32 <sup>a</sup>   | 75.04 $\pm$ 3.54 <sup>b</sup>  |
| Serum IL-1 $\beta$ (pg/mL)  | 23.55 $\pm$ 1.61 <sup>b</sup>   | 23.10 $\pm$ 1.09 <sup>b</sup>   | 41.19 $\pm$ 1.62 <sup>a</sup>   | 24.14 $\pm$ 0.77 <sup>b</sup>  |
| Serum IL-6 (pg/mL)          | 83.36 $\pm$ 1.53 <sup>b</sup>   | 84.68 $\pm$ 3.26 <sup>b</sup>   | 106.98 $\pm$ 2.24 <sup>a</sup>  | 86.23 $\pm$ 3.76 <sup>b</sup>  |
